# Supplementary material for: Epigenetic Silencing of Ubiquitin Specific Protease 4 by Snail1 Contributes to Macrophage-Dependent Inflammation and Therapeutic Resistance in Lung Cancer
Source: PubMed Central journal article supplement (PMC7016945; doi:10.3390/cancers12010148), 2020-01-08
Supplement: cancers-12-00148-s001.pdf [file cancers-12-00148-s001.pdf]

# Epigenetic Silencing of Ubiquitin Specific Protease 4 by Snail1 Contributes to Macrophage-Dependent Inflammation and Therapeutic Resistance in Lung Cancer

Chao-Yang Lai, Da-Wei Yeh, Chih-Hao Lu, Yi-Ling Liu, Yu-Chen Chuang, Jhen-Wei Ruan, Cheng-Yuan Kao, Li-Rung Huang, Tsung-Hsien Chuang

Content: Supplementary Tables S1-S7; Supplementary Figure S1-S5

**Table S1.** Cox coefficients between survival and expression levels of 72 DUBs in lung adenocarcinoma patients

| DUB names   | Cox Coefficient | DUB names   | Cox Coefficient | DUB names       | Cox Coefficient |
|-------------|-----------------|-------------|-----------------|-----------------|-----------------|
| <b>USPs</b> |                 | <b>USPs</b> |                 | <b>OTUs</b>     |                 |
| USP1        | 0.121           | USP31       | 0.009           | OTUB1           | 0.111           |
| USP2        | -0.133          | USP32       | 0.021           | OTUB2           | 0.037           |
| USP3        | -0.040          | USP33       | -0.103          | OTUD1           | -0.117          |
| USP4*       | -0.345          | USP34       | -0.034          | OTUD3           | -0.148          |
| USP5*       | 0.200           | USP39       | 0.060           | OTUD4           | 0.029           |
| USP6        | -0.111          | USP40       | 0.122           | OTUD5*          | -0.152          |
| USP7        | 0.031           | USP42       | 0.053           | OTUD7A          | -0.117          |
| USP8        | -0.039          | USP43       | 0.035           | OTUD7B          | 0.023           |
| USP9X       | 0.053           | USP44*      | -0.261          | TRABID          | -0.066          |
| USP10       | 0.105           | USP45       | 0.039           | VCPIP1          | 0.066           |
| USP11       | -0.036          | USP46       | 0.019           | A20             | 0.059           |
| USP12       | -0.076          | USP47       | 0.001           | <b>Josephin</b> |                 |
| USP13       | 0.069           | USP48       | -0.133          | ATXN3           | -0.081          |
| USP14*      | 0.217           | USP49       | -0.109          | JOSD1*          | 0.217           |
| USP15       | 0.025           | USP51       | -0.134          | JOSD2           | 0.068           |
| USP16       | -0.090          | USP52*      | -0.181          | <b>JAMM/MPN</b> |                 |
| USP18       | 0.138           | USP53       | -0.004          | BRCC36          | 0.046           |
| USP19*      | -0.177          | USP54       | -0.136          | CSN5            | 0.101           |
| USP20*      | -0.218          | USPL1       | -0.098          | POH1*           | 0.205           |
| USP21       | -0.035          | CYLD*       | -0.209          | AMSH            | 0.127           |
| USP22       | 0.043           | <b>UCHs</b> |                 | AMSH-LP         | 0.126           |
| USP24       | -0.101          | UHL1        | 0.092           | MPND*           | -0.218          |
| USP25       | 0.053           | UHL3        | 0.094           | MYSM1           | -0.103          |
| USP27X      | -0.118          | UHL5*       | 0.228           | PRPF8           | -0.031          |
| USP28       | -0.019          | BAP1*       | -0.152          |                 | *: p < 0.05     |
| USP30       | -0.124          |             |                 |                 |                 |

Table S2. Clinical data of patients with samples included in a lung cancer cDNA array.

| Sample number | Well position | Appearance | SAMPLE diagnosis from pathology verification        | Tumor Grade                        | Minimum Stage Grouping | Lesion     |     |           |
|---------------|---------------|------------|-----------------------------------------------------|------------------------------------|------------------------|------------|-----|-----------|
|               |               |            |                                                     |                                    |                        | Normal (%) | (%) | Tumor (%) |
| 1             | C01           | Normal     | Within normal limits                                | Not Applicable                     | Not Applicable         | 100        | 0   | 0         |
| 2             | C02           | Normal     | Within normal limits                                | Not Applicable                     | Not Applicable         | 100        | 0   | 0         |
| 3             | C03           | Normal     | Within normal limits                                | Not Applicable                     | Not Applicable         | 100        | 0   | 0         |
| 4             | C04           | Normal     | Within normal limits                                | Not Applicable                     | Not Applicable         | 100        | 0   | 0         |
| 5             | C05           | Normal     | Within normal limits                                | Not Applicable                     | Not Applicable         | 100        | 0   | 0         |
| 6             | C06           | Normal     | Within normal limits                                | Not Applicable                     | Not Applicable         | 100        | 0   | 0         |
| 7             | C07           | Normal     | Within normal limits                                | Not Applicable                     | Not Applicable         | 100        | 0   | 0         |
| 8             | C08           | Normal     | Within normal limits                                | Not Applicable                     | Not Applicable         | 100        | 0   | 0         |
| 9             | C09           | Tumor      | Carcinoma of lung, squamous cell                    | AJCC G2: Moderately differentiated | IA                     | 10         | 0   | 70        |
| 10            | C10           | Tumor      | Carcinoma of lung, large cell                       | Not Reported                       | IA                     | 0          | 0   | 90        |
| 11            | C11           | Tumor      | Adenocarcinoma of lung                              | AJCC G2: Moderately differentiated | IA                     | 0          | 0   | 70        |
| 12            | C12           | Tumor      | Carcinoma of lung, bronchioloalveolar, non-mucinous | Not Reported                       | IA                     | 0          | 0   | 98        |
| 13            | D01           | Tumor      | Adenocarcinoma of lung                              | AJCC G1: Well differentiated       | IA                     | 10         | 0   | 70        |
| 14            | D02           | Tumor      | Adenocarcinoma of lung                              | AJCC G2: Moderately differentiated | IA                     | 0          | 0   | 80        |
| 15            | D03           | Tumor      | Carcinoma of lung, squamous cell                    | Not Reported                       | IB                     | 10         | 0   | 80        |
| 16            | D04           | Tumor      | Carcinoma of lung, squamous cell                    | AJCC G2: Moderately differentiated | IB                     | 0          | 0   | 55        |
| 17            | D05           | Tumor      | Carcinoma of lung, squamous cell                    | AJCC G3: Poorly differentiated     | IB                     | 0          | 0   | 55        |
| 18            | D06           | Tumor      | Adenocarcinoma of lung, bronchioloalveolar          | Not Reported                       | IB                     | 5          | 0   | 60        |
| 19            | D07           | Tumor      | Carcinoma of lung, neuroendocrine                   | Not Reported                       | IB                     | 0          | 0   | 70        |
| 20            | D08           | Tumor      | Carcinoma of lung, squamous cell                    | AJCC G3: Poorly differentiated     | IB                     | 10         | 0   | 60        |
| 21            | D09           | Tumor      | Adenocarcinoma of lung                              | AJCC G3: Poorly differentiated     | IIA                    | 1          | 0   | 80        |
| 22            | D10           | Tumor      | Carcinoma of lung, small cell, metastatic           | AJCC G3: Poorly differentiated     | IIA                    | 0          | 0   | 50        |
| 23            | D11           | Tumor      | Carcinoma of lung, squamous cell                    | AJCC G3: Poorly differentiated     | IIA                    | 10         | 0   | 80        |
| 24            | D12           | Tumor      | Adenocarcinoma of lung                              | AJCC G2: Moderately differentiated | IIB                    | 0          | 0   | 60        |
| 25            | E01           | Tumor      | Carcinoma of lung, squamous cell                    | Not Reported                       | IIB                    | 0          | 0   | 75        |
| 26            | E02           | Tumor      | Adenocarcinoma of lung                              | AJCC G2: Moderately differentiated | IIB                    | 0          | 0   | 75        |
| 27            | E03           | Tumor      | Carcinoma of lung, squamous cell                    | AJCC G3: Poorly differentiated     | IIB                    | 25         | 0   | 65        |
| 28            | E04           | Tumor      | Adenocarcinoma of lung                              | AJCC G3: Poorly differentiated     | IIB                    | 10         | 0   | 80        |
| 29            | E05           | Tumor      | Adenocarcinoma of lung                              | AJCC G3: Poorly differentiated     | IIB                    | 0          | 0   | 90        |
| 30            | E06           | Tumor      | Carcinoma of lung, squamous cell                    | AJCC G3: Poorly differentiated     | IIB                    | 10         | 0   | 65        |
| 31            | E07           | Tumor      | Carcinoma of lung, squamous cell                    | Not Reported                       | IIB                    | 0          | 0   | 60        |
| 32            | E08           | Tumor      | Carcinoma of lung, squamous cell                    | AJCC G3: Poorly differentiated     | IIIA                   | 5          | 0   | 40        |
| 33            | E09           | Tumor      | Carcinoma of lung, adenosquamous                    | Not Reported                       | IIIA                   | 0          | 0   | 70        |
| 34            | E10           | Tumor      | Carcinoma of lung, large cell, neuroendocrine       | AJCC G3: Poorly differentiated     | IIIA                   | 0          | 0   | 50        |
| 35            | E11           | Tumor      | Carcinoma of lung, small cell                       | Not Reported                       | IIIA                   | 5          | 0   | 50        |
| 36            | E12           | Tumor      | Adenocarcinoma of lung                              | AJCC G2: Moderately differentiated | IIIA                   | 0          | 0   | 74        |
| 37            | F01           | Tumor      | Carcinoma of lung, sarcomatoid                      | AJCC G3: Poorly differentiated     | IIIB                   | 0          | 0   | 55        |
| 38            | F02           | Tumor      | Adenocarcinoma of lung, bronchioloalveolar          | Not Reported                       | IIIB                   | 5          | 0   | 90        |
| 39            | F03           | Tumor      | Carcinoma of lung, adenosquamous                    | AJCC G3: Poorly differentiated     | IIIB                   | 40         | 0   | 50        |
| 40            | F04           | Tumor      | Adenocarcinoma of lung, bronchioloalveolar          | AJCC G1: Well differentiated       | IIIB                   | 5          | 0   | 50        |
| 41            | F05           | Tumor      | Carcinoma of lung, squamous cell                    | AJCC G3: Poorly differentiated     | IIIB                   | 0          | 0   | 85        |
| 42            | F06           | Tumor      | Adenocarcinoma of lung                              | AJCC G2: Moderately differentiated | IV                     | 10         | 0   | 40        |
| 43            | F07           | Tumor      | Carcinoma of lung, non-small cell, metastatic       | Not Reported                       | IV                     | 10         | 0   | 85        |
| 44            | F08           | Tumor      | Carcinoma of lung, non-small cell, metastatic       | AJCC G3: Poorly differentiated     | IV                     | 25         | 0   | 60        |
| 45            | F09           | Tumor      | Carcinoma of lung, squamous cell, metastatic        | AJCC G3: Poorly differentiated     | IV                     | 0          | 0   | 90        |
| 46            | F10           | Tumor      | Adenocarcinoma of lung                              | AJCC G2: Moderately differentiated | IV                     | 10         | 0   | 70        |
| 47            | F11           | Tumor      | Adenocarcinoma of lung, metastatic                  | AJCC G3: Poorly differentiated     | IV                     | 0          | 0   | 80        |
| 48            | F12           | Tumor      | Adenocarcinoma of lung, metastatic                  | Not Reported                       | IV                     | 0          | 0   | 80        |

Table S3. Downregulation of USP4 in stemness-enriched and therapy-resistant cancer cells.

| <b>Down-regulation of USP4 (&gt; 2-fold) in cancer stem-like cells</b> |                                    |               |                      |
|------------------------------------------------------------------------|------------------------------------|---------------|----------------------|
|                                                                        | <b>Cell type</b>                   | <b>Log FC</b> | <b>Accession no.</b> |
| <b>HNSCC</b>                                                           | <b>SAS sphere</b>                  | <b>-1.322</b> | <b>GSE35603</b>      |
|                                                                        | <b>FaDu Bmi1 overexpression</b>    | <b>-1.024</b> | <b>GSE35603</b>      |
|                                                                        | <b>MCF-7 snail1 overexpression</b> | <b>-1.862</b> | <b>GSE35603</b>      |
| <b>Breast cancer</b>                                                   | <b>MCF-7 doxorubicin resistant</b> | <b>-1.230</b> | <b>GSE24460</b>      |
|                                                                        | <b>PC9 gefitinib resistant</b>     | <b>-1.080</b> | <b>GSE60189</b>      |
| <b>Lung cancer</b>                                                     | <b>A549 radioresistant</b>         | <b>-1.488</b> | <b>GSE35603</b>      |

Table S4. Wild type and mutated DNA sequences of E-boxes in the USP4 promoter region.

| Promoter region  |              | Sequence      |
|------------------|--------------|---------------|
| E-box            |              | CANNTG        |
| E-box-I          | -458 to -453 | CACCTG        |
| mutant E-box-I   | -458 to -453 | <u>AACCTA</u> |
| E-box-II         | -516 to -511 | CAGCTG        |
| mutant E-box-II  | -516 to -511 | <u>AAGCTA</u> |
| E-box-III        | -538 to -533 | CAGCTG        |
| mutant E-box-III | -538 to -533 | <u>AAGCTA</u> |
| E-box-IV         | -684 to -679 | CAGGTG        |
| mutant E-box-IV  | -684 to -679 | <u>AAGGTA</u> |

Table S5. Sequences of forward and reverse primers employed for PCR amplification of human genes.

|               |                                    |
|---------------|------------------------------------|
| USP4          | Forward 5'-CTTATTGACAGCCGGTGGTT-3' |
|               | Reverse 5'-GTTTATTCCACGCCTCGGTA-3' |
| GAPDH         | forward 5'-GAGTCAACGGATTTGGTCGT-3' |
|               | reverse 5'-GACAAGCTTCCCCTTCTCAG-3' |
| OCT-4         | forward 5'-GAAGGATGTGGTCCGAGTGT-3' |
|               | reverse 5'-GTGAAGTGAGGGCTCCCATA-3' |
| SOX-2         | forward 5'-ACACCAATCCCATCCCACT-3'  |
|               | reverse 5'-GCAAACCTCCTGCAAAGCTC-3' |
| NANOG         | forward 5'-TTCCTTCCTCCATGGATCTG-3' |
|               | reverse 5'-ATCTGCTGGAGGCTGAGGTA-3' |
| KLF-4         | forward 5'-ACCCACACAGGTGAGAAACC-3' |
|               | reverse 5'-ATGTGTAAGGCGAGGTGGTC-3' |
| ABCG2         | forward 5'-GTGGCCTTGGCTTGTATGAT-3' |
|               | reverse 5'-AACAATTGCTGCTGTGCAAC-3' |
| ALDH1         | forward 5'-TGTTAGCTGATGCCGACTTG-3' |
|               | reverse 5'-CTTCTTAGCCCGCTCAACAC-3' |
| TNF- $\alpha$ | forward 5'-AACCTCCTCTCTGCCATCAA-3' |
|               | reverse 5'-CCAAAGTAGACCTGCCAGA-3'  |
| IL-1 $\beta$  | forward 5'-ACGATGCACCTGTACGATCA-3' |
|               | reverse 5'-TCTTCAACACGCAGGACAG-3'  |
| IL-6          | forward 5'-TACCCCAAGGAGAAGATTCC-3' |
|               | reverse 5'-TTTTCTGCCAGTGCCTCTTT-3' |
| IL-8          | forward 5'-GTGCAGTTTTGCCAAGGAGT-3' |
|               | reverse 5'-CTCTGCACCCAGTTTTCTT-3'  |
| SNAIL1        | forward 5'-TTTACCTTCCAGCAGCCCTA-3' |
|               | reverse 5'-CCCCTGTCTCATCTGACA-3'   |

Table S6. Sequences of forward and reverse primers employed for PCR amplification of mouse genes.

|               |                                    |
|---------------|------------------------------------|
| Usp4          | Forward 5'-TCACCTCAAGCGTTTCTCCT-3' |
|               | Reverse 5'-CCATTCCCCTTCAGTCTGT-3'  |
| Gapdh         | forward 5'-ACCCAGAAGACTGTGGATGG-3' |
|               | reverse 5'-CACATTGGGGGTAGGAACAC-3' |
| Oct-4         | forward 5'-AAGCCCTCCCTACAGCAGAT-3' |
|               | reverse 5'-CTGGGAAAGGTGTCCCTGTA-3' |
| Sox-2         | forward 5'-AAGGGTTCTTGCTGGGTTTT-3' |
|               | reverse 5'-AGACCACGAAAACGGTCTTG-3' |
| Nanog         | forward 5'-CCAGTGGAGTATCCCAGCAT-3' |
|               | reverse 5'-GAAGTTATGGAGCGGAGCAG-3' |
| Klf-4         | forward 5'-GCAGTCACAAGTCCCCTCTC-3' |
|               | reverse 5'-CTGTGTGAGTTCGCAGGTGT-3' |
| Abcg2         | forward 5'-CCATTCATCAGCCTCGGTAT-3' |
|               | reverse 5'-AATCCGCAGGGTTGTGTAG-3'  |
| Aldh1         | forward 5'-GCACTCAATGGTGGGAAAGT-3' |
|               | reverse 5'-TTTGGCCACACACTCCAATA-3' |
| Tnf- $\alpha$ | forward 5'-AGCCCCAGTCTGTATCCTT-3'  |
|               | reverse 5'-CTCCCTTGCAGAACTCAGG-3'  |
| Il-1 $\beta$  | forward 5'-CAGGCAGGCAGTATCACTCA-3' |
|               | reverse 5'-AGCTCATATGGGTCCGACAG-3' |
| Il-6          | forward 5'-AGTTGCCTTCTTGGGACTGA-3' |
|               | reverse 5'-TCCACGATTCCAGAGAAC-3'   |
| Il-8          | forward 5'-CGTCCCTGTGACACTCAAGA-3' |
|               | reverse 5'-TAATTGGGCCAACAGTAGCC-3' |
| Snail1        | forward 5'-TTCACCTCCAGCAGCCCTA-3'  |
|               | reverse 5'-GCCACTGTCCTCATCGGACA-3' |

**Table S7. Sequences of forward and reverse primers employed for bisulfite PCR amplification of the human USP4 promoter.**

|                      |                                               |
|----------------------|-----------------------------------------------|
|                      | <b>Forward 5'-TTTGGTTTGTATTATTTAGGATTA-3'</b> |
| <b>Usp4 promoter</b> | <b>Reverse 5'-ATCCTCATTAAAAATCCAAACTC-3</b>   |

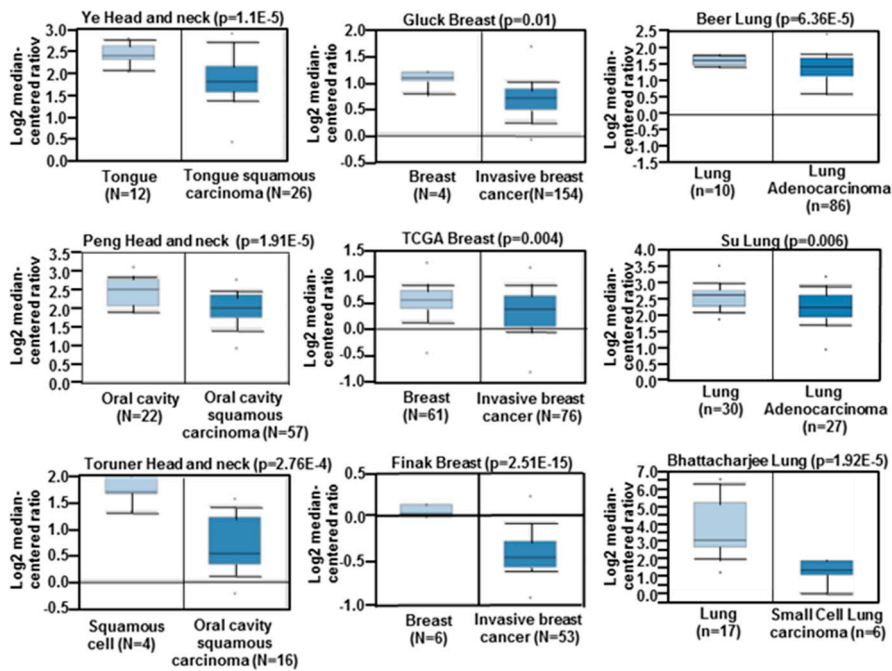

**Supplementary Figure S1.** Low expression of USP4 in different cancer types. Data were acquired from the Oncomine database. Tissue sample numbers are shown in parentheses.

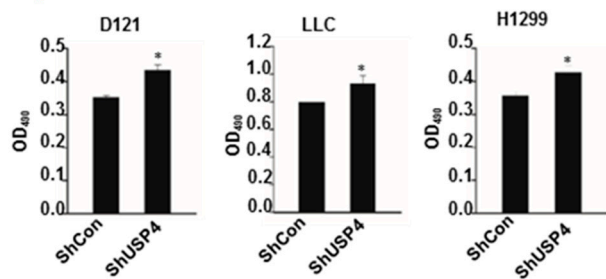

**Supplementary Figure S2.** Stable USP4 knockdown enhances proliferation of lung cancer cells. Cells were seed onto 96-well plates at 5000 cells/well for 48 h and then incubated with CellTiter 96 AQueous Non-Radioactive Cell Proliferation (MTS) reagent (Promega) for 2 h. The absorbance at 490 nm was measured using an Envision Alpha Multilabel Reader (PerkinElmer). Data presented mean  $\pm$  SD. \*P < 0.05.

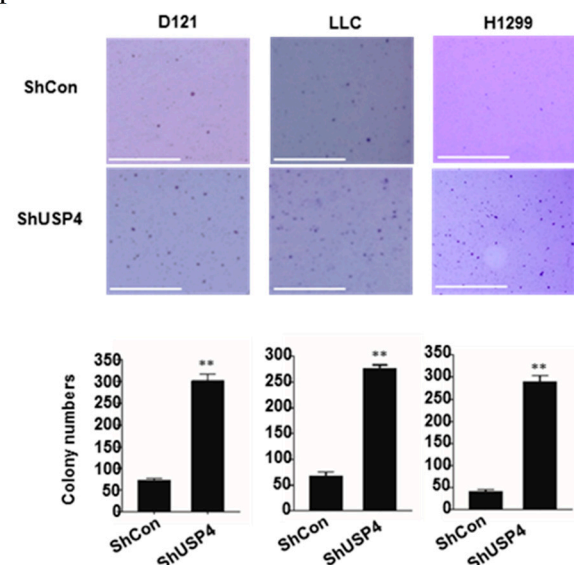

**Supplementary Figure S3.** Stable USP4 knockdown anchorage-independent growth of lung cancer cells. For anchorage-independent colony forming assays, bottom agar (DMEM, 10% FBS, 0.8% agarose) was added to each well of six-well tissue culture plates and allowed to solidify. Top



agar (DMEM, 10% FBS, 0.4% agarose) containing cells ( $1 \times 10^4$ /well) was added, followed by the addition of growth medium. The plates were incubated at 37 °C for 2–3 weeks and colony formation was monitored under light microscopy. The plates were fixed with 4% formaldehyde and stained with 0.005% crystal violet in PBS for 1 h, and colonies were photographed and counted. The total number of colonies with a diameter of  $\geq 100 \mu\text{m}$  was quantified over four randomly chosen fields per well from triplicate repeats (12 fields per condition). Colonies were counted after 3 weeks. Top panels: Representative photographs showing colony formation. Bottom bar figures: enumeration of colonies in three culture wells. White scale bar: 1 cm. Data presented mean  $\pm$  SD. \* $P < 0.05$ ; \*\* $P < 0.01$ .

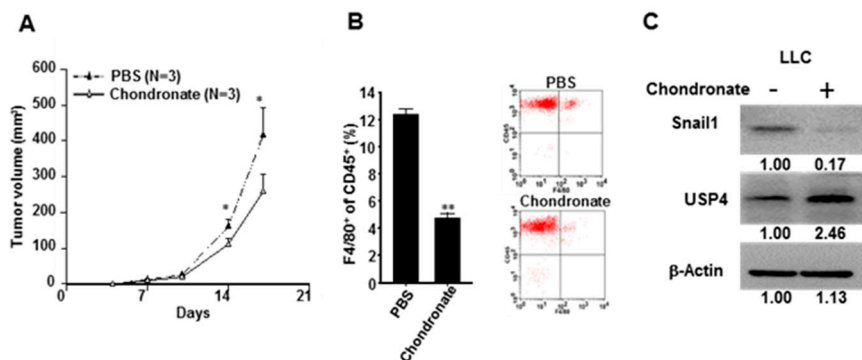

**Supplementary Figure S4.** To investigate the effect of macrophages on the expression of USP4 and Snail1 in tumors and tumor growth, C57BL/6 mice were injected with or without clodronate liposomes for macrophage depletion with 100  $\mu\text{l}$  of clodronate liposomes 2 days before inoculation of cancer cells and then every 5 days. These mice were subcutaneously injected with  $2 \times 10^5$  of LLC cells in 100  $\mu\text{l}$  of PBS. (A) These mice were monitored for tumor growth. The mice were sacrificed at day 20. (B) Populations of F4/80<sup>+</sup>, CD45<sup>+</sup> macrophage in blood samples were analyzed with flow cytometry. Left panel shows a set of histograms for the flow analysis. (C) Expression of Snail1 and USP4 in the tumors are detected with immunoblotting.  $\beta$ -actin was blotted as control. Data presented mean  $\pm$  SD. \* $P < 0.05$ ; \*\* $P < 0.01$ .

Figure 3G

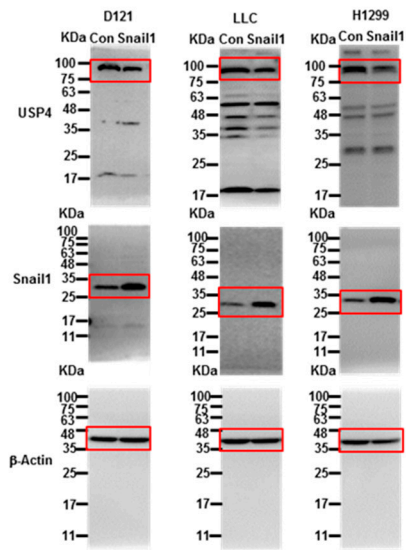

Figure 6A

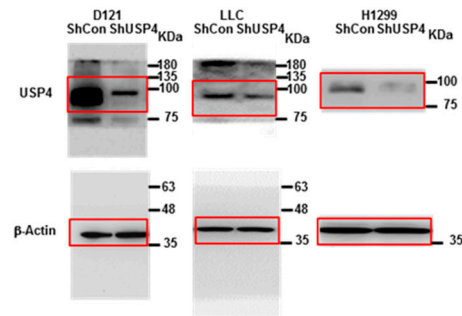

Figure 5F

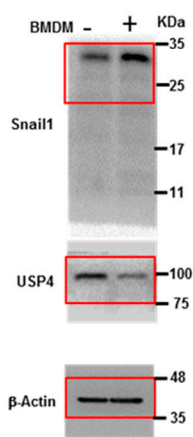

Figure 5G

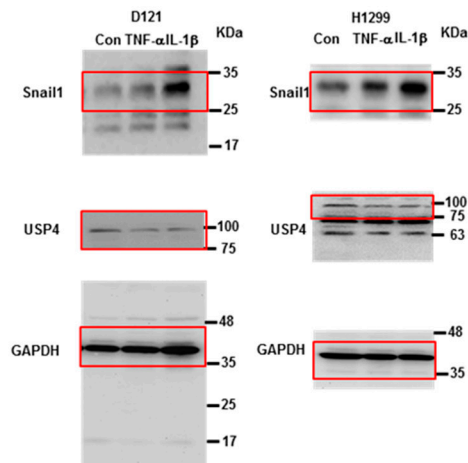

Supplementary Figure S5. Whole blots for immunoblots shown in Figure 3G, Figure 4F and G, and Figure 5A
